# Supplementary material for: Co3O4-nanoparticle-entrapped nitrogen and boron codoped mesoporous carbon as an efficient electrocatalyst for hydrogen evolution
Source: Royal Society of Chemistry journal article supplement (doi:10.1039/c8dt05033c), 2019-01-01
Supplement: c8dt05033c1.pdf [file c8dt05033c1.pdf]

## Supporting Information

### **Co<sub>3</sub>O<sub>4</sub> nanoparticles entrapped, nitrogen and boron codoped mesoporous carbon as efficient electrocatalysts for hydrogen evolving**

Duihai Tang,<sup>a</sup> Xue Sun,<sup>a</sup> Huan Yu,<sup>a</sup> Wenting Zhang,<sup>a</sup> Ling Zhang,<sup>c</sup> Xuefeng Li,<sup>d</sup> Zhen-An Qiao\*<sup>b</sup>, Junjiang Zhu,<sup>a</sup> Zhen Zhao\*<sup>a</sup>

<sup>a</sup> Institute of Catalysis for Energy and Environment, College of Chemistry and Chemical Engineering, Shenyang Normal University, Shenyang 110034, P. R. China.

E-mail: zhaozhen1586@163.com; zhaozhen@synu.edu.cn; zhenzhen@cup.edu.cn

<sup>b</sup> State Key Laboratory of Inorganic Synthesis and Preparative Chemistry, College of Chemistry, Jilin University, Changchun 130012, P. R. China.

E-mail: qiaozhenan@jlu.edu.cn

<sup>c</sup> College of Chemistry, Jilin University, Changchun 130012, P. R. China.

Email: zhanglingchem@jlu.edu.cn

<sup>d</sup> Alan G. MacDiarmid Institute, College of Chemistry, Jilin University, Changchun 130012, P. R. China.

E-mail: xuefengli@jlu.edu.cn

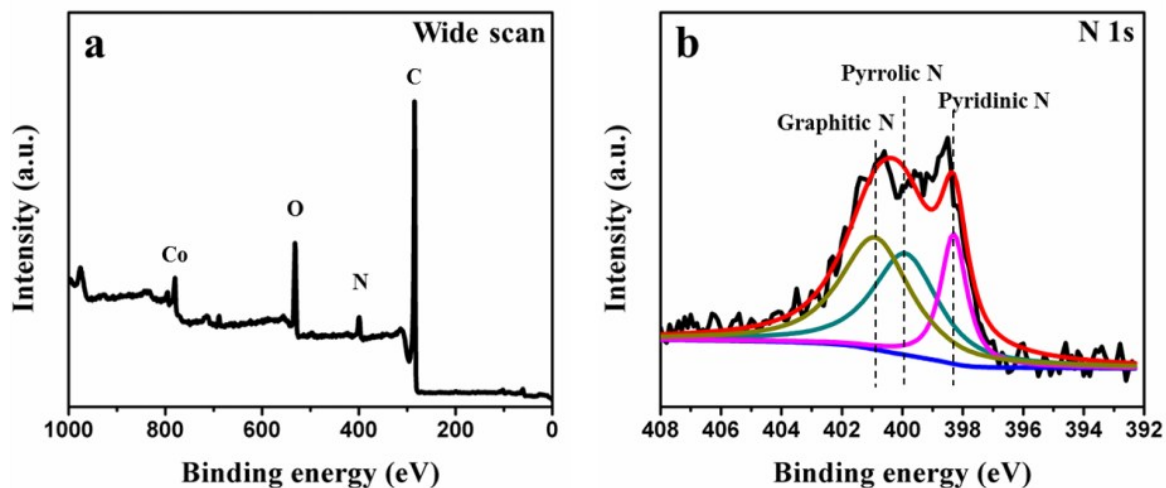

**Fig. S1** (a) XPS survey spectrum of Co<sub>0.65</sub>B<sub>0.0</sub>NC<sub>800</sub>, (b) high-resolution N 1s XPS spectrum of Co<sub>0.65</sub>B<sub>0.0</sub>NC<sub>800</sub>.

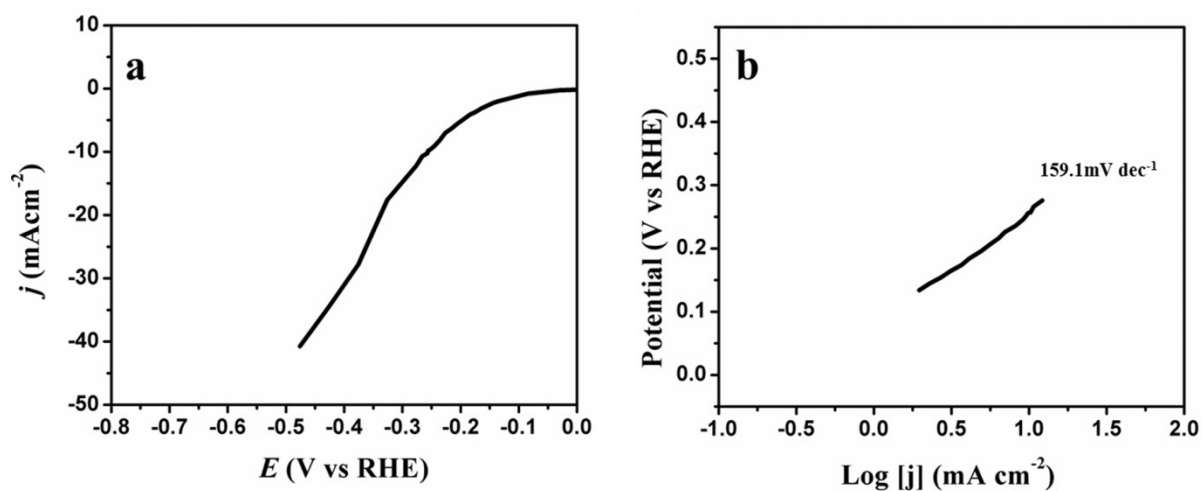

**Fig. S2** (a) LSV curve of Co<sub>0.65</sub>B<sub>0.0</sub>NC<sub>800</sub> in 1 M KOH. (b) The corresponding Tafel plots in 1 M KOH.

**Table S1** Elements contents of the catalysts analyzed from XPS.

| Samples                                   | Elements contents (%) |       |       |       |      |
|-------------------------------------------|-----------------------|-------|-------|-------|------|
|                                           | C                     | B     | N     | O     | Co   |
| Co <sub>0.65</sub> B <sub>0.3</sub> NC600 | 70.51                 | 1.31  | 14.62 | 12.14 | 1.43 |
| Co <sub>0.65</sub> B <sub>0.3</sub> NC700 | 61.51                 | 11.02 | 9.23  | 17.01 | 1.23 |
| Co <sub>0.65</sub> B <sub>0.3</sub> NC800 | 64.35                 | 8.67  | 8.87  | 15.8  | 2.30 |
| Co <sub>0.65</sub> B <sub>0.3</sub> NC900 | 51.88                 | 15.96 | 13.22 | 16.82 | 2.12 |
| Co <sub>0.49</sub> B <sub>0.3</sub> NC800 | 72.09                 | 5.35  | 6.39  | 13.84 | 2.32 |
| Co <sub>0.82</sub> B <sub>0.3</sub> NC800 | 40.55                 | 16.75 | 16.01 | 23.22 | 3.46 |
| Co <sub>0.65</sub> B <sub>0.1</sub> NC800 | 67.11                 | 7.53  | 6.68  | 16.08 | 2.61 |
| Co <sub>0.65</sub> B <sub>0.5</sub> NC800 | 65.18                 | 3.40  | 13.03 | 15.95 | 2.43 |

**Table S2** Double layer capacitance ( $C_{dl}$ ), ECSA, and TOF values of the catalysts.

| Sample                                    | $C_{dl}$<br>(mF cm <sup>-2</sup> ) | ECSA<br>(cm <sup>2</sup> ) | TOF <sup>a</sup><br>(S <sup>-1</sup> ) |
|-------------------------------------------|------------------------------------|----------------------------|----------------------------------------|
| Co <sub>0.65</sub> B <sub>0.3</sub> NC600 | 0.01                               | 0.25                       | 0.00001                                |
| Co <sub>0.65</sub> B <sub>0.3</sub> NC700 | 0.03                               | 0.75                       | 0.00033                                |
| Co <sub>0.65</sub> B <sub>0.3</sub> NC800 | 43.71                              | 1092.75                    | 0.00191                                |
| Co <sub>0.65</sub> B <sub>0.3</sub> NC900 | 10.23                              | 255.75                     | 0.00071                                |
| Co <sub>0.49</sub> B <sub>0.3</sub> NC800 | 19.46                              | 486.5                      | 0.00171                                |
| Co <sub>0.82</sub> B <sub>0.3</sub> NC800 | 3.57                               | 89.25                      | 0.00015                                |
| Co <sub>0.65</sub> B <sub>0.1</sub> NC800 | 27.56                              | 689                        | 0.00133                                |
| Co <sub>0.65</sub> B <sub>0.5</sub> NC800 | 17.32                              | 433                        | 0.00069                                |

<sup>a</sup> TOFs were calculated at the overpotential of 200 mV
